# Supplementary material for: Deletion of Salmonella enterica serovar Typhi tolC reduces bacterial adhesion and invasion toward host cells
Source: Front Microbiol. 2023 Nov 3;14:1301478. doi: 10.3389/fmicb.2023.1301478 (PMC10655110; doi:10.3389/fmicb.2023.1301478)
Supplement: Supplementary file 1 [file Table_1.xlsx]

## Sheet: Growth curve with CFU
16h	EX-1	EX-2	Ex-3	Ex-4
Value	1	2	3	4	Mean	SD
ST-ΔTolC	1360000000	1300000000	1300000000	1360000000	1330000000	3.4641e+07
ST-WT	2000000000	1900000000	2000000000	2000000000	1975000000	50000000
ST-∆TolC+	2100000000	2400000000	2400000000	2300000000	2300000000	1.41421e+08
24h	EX-1	EX-2	Ex-3	Ex-4
Value	1	2	3	4	Mean	SD
ST-ΔTolC	1340000000	1500000000	1500000000	1340000000	1420000000	9.2376e+07
ST-WT	2200000000	2400000000	2400000000	2200000000	2300000000	1.1547e+08
ST-∆TolC+	2400000000	2300000000	2400000000	2400000000	2375000000	50000000				Mean CFU readings
	EX-1	EX-2	Ex-3	Ex-4					Time (Hrs)	ST-ΔtolC		ST-WT	ST-∆tolC+
48h	1	2	3	4					0	0		0	0
Value									16	1330000000		1975000000	2300000000
ST-ΔTolC	1000000000	1140000000	1000000000	1140000000	1070000000	8.0829e+07			24	1420000000		2300000000	2375000000
ST-WT	2800000000	2200000000	2300000000	2700000000	2500000000	2.94392e+08			48	1070000000		2500000000	2475000000
ST-∆tolC+	2900000000	2300000000	2400000000	2300000000	2475000000	2.87228e+08			72	430000000		2550000000	2625000000
	EX-1	EX-2	Ex-3	Ex-4
72h	1	2	3	4
Value
ST-ΔTolC	460000000	460000000	400000000	400000000	430000000	3.4641e+07			SD
ST-WT	2500000000	2300000000	3000000000	2400000000	2550000000	3.10913e+08				Mean CFU readings
ST-∆tolC+	2500000000	2500000000	3000000000	2500000000	2625000000	250000000			Time (Hrs)	ST-ΔTolC		ST-WT	ST-∆tolC+
									0	0		0	0
									16	3.4641e+07		50000000	1.41421e+08
									24	9.2376e+07		1.1547e+08	50000000
									48	8.0829e+07		2.94392e+08	2.87228e+08
									72	3.4641e+07		3.10913e+08	250000000

## Sheet: HT-29 adhesion, and invasion
Level of addesion HT-29 cell 2h with invasion assay
Adhesion Assay for HT-29 cell
Asssociation aasay redding						Mean of association
WT	1600000	1300000	1400000	1520000		1455000
∆tolC	480000	420000	460000	450000		452500
∆tolC+	1970000	2100000	1990000	2290000		2087500
Invsion assay with HT-29, 2h ex-1
					Mean	SD
WT	480000	400000	520000		466667	61101
∆tolC	200	300	200		233.333	57.735
∆tolC+	720000	750000	890000		786667	90737.7
Adhesion level = Mean CFU/ml association --- Mean cfu/ml of invsion assay										Adhesion level reading
WT		1455000			466667				WT	988333	0	0
∆tolC		452500			233.333				∆tolC	452267	0	0
∆tolC+		2087500			786667				∆tolC+	1.30083e+06	0	0
Asssociation aasay redding EX-2						Mean of association
WT	1300000	1390000	1400000	1490000		1395000
∆tolC	480000	469000	478000	460000		471750
∆tolC+	1990000	2200000	1990000	1980000		2040000
Level of adhesion HT-29 cell 2h with invasion assay on ex-2
					mean	SD
WT	300000	320000	390000		336667
∆tolC	200	300	300		266.667
∆tolC+	680000	650000	600000		643333
Adhesion level = Mean CFU/ml association --- Mean cfu/ml of invsion assay											Adhesion level reading and graph
WT		1395000			336667					WT	1.05833e+06
∆tolC		471750			266.667					∆tolC	471483
∆tolC+		2040000			643333					∆tolC+	1.39667e+06
Asssociation aasay redding ex-3						Mean of association
WT	1460000	1490000	1410000	1540000		1475000
∆tolC	590000	530000	488000	410000		504500
∆tolC+	1990000	2240000	1990000	2000000		2055000
Level of adhesion HT-29 cell 2h with invasion assay
					mean	0
WT	450000	420000	430000		433333
∆tolC	200	200	200		200
∆tolC+	710000	750000	720000		726667
Adhesion level = Mean CFU/ml association --- Mean cfu/ml of invsion assay											Adhesion level reading and graph
WT		1475000			433333					WT	1.04167e+06
∆tolC		504500			200					∆tolC	504300
∆tolC+		2055000			726667					∆tolC+	1.32833e+06
Asssociation aasay redding ex-4						Mean of association
WT	1460000	1490000	1400000	1340000		1422500
∆tolC	440000	459000	468000	450000		454250
∆tolC+	2290000	2360000	1990000	1990000		2157500
Level of adhesion THP-1 cell 2h with invasion assay on ex-4
					mean	0
WT	450000	420000	430000		433333
∆tolC	200	300	200		233.333
∆tolC+	710000	690000	730000		710000
Adhesion level = Mean CFU/ml association --- Mean cfu/ml of invsion assay											Adhesion level reading and graph
WT		1422500			433333					WT	989167
∆tolC		454250			233.333					∆tolC	454017
∆tolC+		2157500			710000					∆tolC+	1447500
Invasion mean of three independent experiment HT-29
	Invasion
			EX-1	EX-2	Ex-3	Ex-4	mean of three independent experiment					SD of three independent experiment
		WT	466667	336667	433333	433333	417500					48612.7
		∆tolC	233.333	266.667	200	233.333	233.333					23.5702
		∆tolC+	786667	643333	726667	710000	716667					51044.6
Adhesion mean of three independent experiment HT-29
	Adhesion		28-6-13	20-4-13
			EX-1	EX-2	Ex-3	EX-4	mean of three independent experiment					SD of three independent experiment
		WT	988333	1.05833e+06	1.04167e+06	989167		1019375				36013
		∆tolC	452267	471483	504300	454017		470517				24135.5
		∆tolC+	1.30083e+06	1.39667e+06	1.32833e+06	1447500		1.36833e+06				66398.8
	Adhesion and invasion assay together graph HT-29 cell
	Level of adesion THP-1 2h with invasion assay on
								ST-ΔTolC
								ST-WT
	Mean			ST-WT	ST-ΔTolC	ST-∆tolC+		ST-∆tolC+
		Adhesion		1019375	470517	1.36833e+06
		Invasion		417500	233.333	716667
		SD		WT	∆tolC	∆tolC+
	SD	Adhesion		36013	24135.5	66398.8
		Invasion		48612.7	23.5702	51044.6
Student t test for Adhesion assay
t-Test: Two-Sample Assuming Equal Variances					t-Test: Two-Sample Assuming Equal Variances
	WT	∆tolC				WT	∆tolC+
Mean	1019375	462329			Mean	1019375	1367500
Variance	1.29693e+09	2.81691e+07			Variance	1.29693e+09	3.20046e+09
Observations	4	4			Observations	4	4
Pooled Variance	6.62551e+08				Pooled Variance	2.2487e+09
Hypothesized Mean Difference	0				Hypothesized Mean Difference	0
df	6				df	6
t Stat	30.6053				t Stat	-10.3821
P(T<=t) one-tail	4.03847e-08				P(T<=t) one-tail	2.33759e-05
t Critical one-tail	1.94318				t Critical one-tail	1.94318
P(T<=t) two-tail	8.07693e-08				P(T<=t) two-tail	4.67517e-05
t Critical two-tail	2.44691				t Critical two-tail	2.44691
Student t test for invasion assay
t-Test: Two-Sample Assuming Equal Variances					t-Test: Two-Sample Assuming Equal Variances
	WT	∆tolC				WT	∆tolC+
Mean	417500	233.333			Mean	417500	717500
Variance	3.15093e+09	740.741			Variance	3.15093e+09	5.46296e+07
Observations	4	4			Observations	4	4
Pooled Variance	1.57546e+09				Pooled Variance	1.60278e+09
Hypothesized Mean Difference	0				Hypothesized Mean Difference	0
df	6				df	6
t Stat	14.867				t Stat	-10.5974
P(T<=t) one-tail	2.91328e-06				P(T<=t) one-tail	2.07827e-05
t Critical one-tail	1.94318				t Critical one-tail	1.94318
P(T<=t) two-tail	5.82656e-06				P(T<=t) two-tail	4.15654e-05
t Critical two-tail	2.44691				t Critical two-tail	2.44691

## Sheet: THP-1 adhesion, and invasion 
Level of addesion THP-1 cell 2h with invasion assay
Adhesion Assay for THP- cell
Asssociation aasay redding						Mean of association
WT	1990000	2340000	2470000	2180000		2245000
∆tolC	975000	880000	920000	940000		928750
∆tolC+	4800000	4600000	4700000	4500000		4650000
Invsion assay with THP-1, 2h ex-1
					Mean	SD
WT	660000	860000	760000		760000	100000
∆tolC	162000	150000	140000		150667	11015.1
∆tolC+	1640000	1400000	1520000		1520000	120000
Adhesion level = Mean CFU/ml association --- Mean cfu/ml of invsion assay										Adhesion level reading
WT		2245000			760000				WT	1485000	0	0
∆tolC		928750			150667				∆tolC	778083	0	0
∆tolC+		4650000			1520000				∆tolC+	3130000	0	0
Asssociation aasay redding EX-2						Mean of association
WT	2340000	2600000	2500000	2590000		2507500
∆tolC	980000	870000	970000	950000		942500
∆tolC+	5700000	4800000	4000000	4500000		4750000
Level of adhesion THP-1 cell 2h with invasion assay on ex-2
					mean	SD
WT	660000	600000	630000		630000
∆tolC	120000	138000	129000		129000
∆tolC+	1500000	1660000	1560000		1.57333e+06
Adhesion level = Mean CFU/ml association --- Mean cfu/ml of invsion assay											Adhesion level reading and graph
WT		2507500			630000					WT	1877500
∆tolC		942500			129000					∆tolC	813500
∆tolC+		4750000			1.57333e+06					∆tolC+	3.17667e+06
Asssociation aasay redding ex-3						Mean of association
WT	2360000	2590000	2760000	2370000		2520000
∆tolC	990000	950000	970000	980000		972500
∆tolC+	4800000	4800000	4600000	5700000		4975000
Level of adhesion THP-1 cell 2h with invasion assay
					mean	0
WT	620000	500000	530000		550000
∆tolC	162000	150000	140000		150667
∆tolC+	1540000	1640000	1560000		1580000
Adhesion level = Mean CFU/ml association --- Mean cfu/ml of invsion assay											Adhesion level reading and graph
WT		2520000			550000					WT	1970000
∆tolC		972500			150667					∆tolC	821833
∆tolC+		4975000			1580000					∆tolC+	3395000
Asssociation aasay redding ex-4						Mean of association
WT	2180000	2800000	2180000	1990000		2287500
∆tolC	830000	880000	860000	840000		852500
∆tolC+	4800000	4800000	4600000	5700000		4975000
Level of adhesion THP-1 cell 2h with invasion assay on ex-4
					mean	0
WT	820000	560000	630000		670000
∆tolC	132000	120000	140000		130667
∆tolC+	1540000	1640000	1880000		1.68667e+06
Adhesion level = Mean CFU/ml association --- Mean cfu/ml of invsion assay											Adhesion level reading and graph
WT		2287500			670000					WT	1617500
∆tolC		852500			130667					∆tolC	721833
∆tolC+		4975000			1.68667e+06					∆tolC+	3.28833e+06
Invasion mean of three independent experiment THP-1
	Invasion
			EX-1	EX-2	Ex-3	Ex-4	mean of three independent experiment					SD of three independent experiment
		WT	760000	630000	550000	670000	652500					75622.4
		∆tolC	150667	129000	150667	130667	140250					10433.3
		∆tolC+	1520000	1.57333e+06	1580000	1.68667e+06	1590000					60461.2
Adhesion mean of three independent experiment THP-1
	Adhesion
			EX-1	EX-2	Ex-3		mean of three independent experiment					SD of three independent experiment
		WT	1485000	1877500	1970000	1617500		1737500				224954
		∆tolC	778083	813500	821833	721833		783813				45464.9
		∆tolC+	3130000	3.17667e+06	3395000	3.28833e+06		3247500				118669
	adhesion and invasion assay together graph THP-1 cell
	Level of adesion THP-1 2h with invasion assay on 28-6-13
	Mean			ST-WT	ST-ΔTolC	ST-∆tolC+
		Adhesion		1737500	783813	3247500
		Invasion		652500	140250	1590000
		SD		WT	∆tolC	∆tolC+
	SD	Adhesion		224954	45464.9	118669
		Invasion		75622.4	10433.3	60461.2
Student t test for Adesion assay
	t-Test: Two-Sample Assuming Equal Variances
						t-Test: Two-Sample Assuming Equal Variances
		WT	∆tolC
	Mean	1737500	798563				WT	∆tolC+
	Variance	5.06042e+10	2.77857e+09			Mean	1737500	3.27417e+06
	Observations	4	4			Variance	5.06042e+10	1.98306e+10
	Pooled Variance	2.66914e+10				Observations	4	4
	Hypothesized Mean Difference	0				Pooled Variance	3.52174e+10
	df	6				Hypothesized Mean Difference	0
	t Stat	8.12767				df	6
	P(T<=t) one-tail	9.31661e-05				t Stat	-11.5802
	t Critical one-tail	1.94318				P(T<=t) one-tail	1.24753e-05
	P(T<=t) two-tail	0.000186332				t Critical one-tail	1.94318
	t Critical two-tail	2.44691				P(T<=t) two-tail	2.49505e-05
						t Critical two-tail	2.44691
	t-test for invasion assay
	t-Test: Two-Sample Assuming Equal Variances					t-Test: Two-Sample Assuming Equal Variances
		WT	∆tolC				WT	∆tolC+
	Mean	652500	125500			Mean	652500	1.56333e+06
	Variance	7625000000	7.05889e+08			Variance	7625000000	8.44444e+08
	Observations	4	4			Observations	4	4
	Pooled Variance	4.16544e+09				Pooled Variance	4.23472e+09
	Hypothesized Mean Difference	0				Hypothesized Mean Difference	0
	df	6				df	6
	t Stat	11.5477				t Stat	-19.7944
	P(T<=t) one-tail	1.26795e-05				P(T<=t) one-tail	5.39134e-07
	t Critical one-tail	1.94318				t Critical one-tail	1.94318
	P(T<=t) two-tail	2.5359e-05				P(T<=t) two-tail	1.07827e-06
	t Critical two-tail	2.44691				t Critical two-tail	2.44691
